# Supplementary material for: Mercapto-pyrimidines are reversible covalent inhibitors of the papain-like protease (PLpro) and inhibit SARS-CoV-2 (SCoV-2) replication
Source: RSC Adv. 2023 Jun 12;13(26):17667–77. doi: 10.1039/d3ra01915b (PMC10259201; doi:10.1039/d3ra01915b)
Supplement: RA-013-D3RA01915B-s001 [file RA-013-D3RA01915B-s001.pdf]

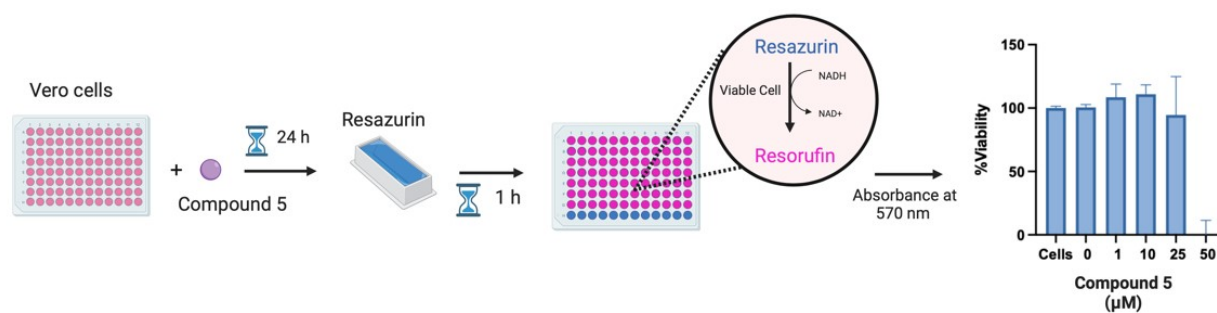

**Fig S1.** Cytotoxicity assay of compound 5. Different concentrations (1, 10, 20 and 50 μM) of the compound 5 were tested in Vero CCL81 cells. The viability was analyzed using resazurin assay and measured absorbance at 570 nm.

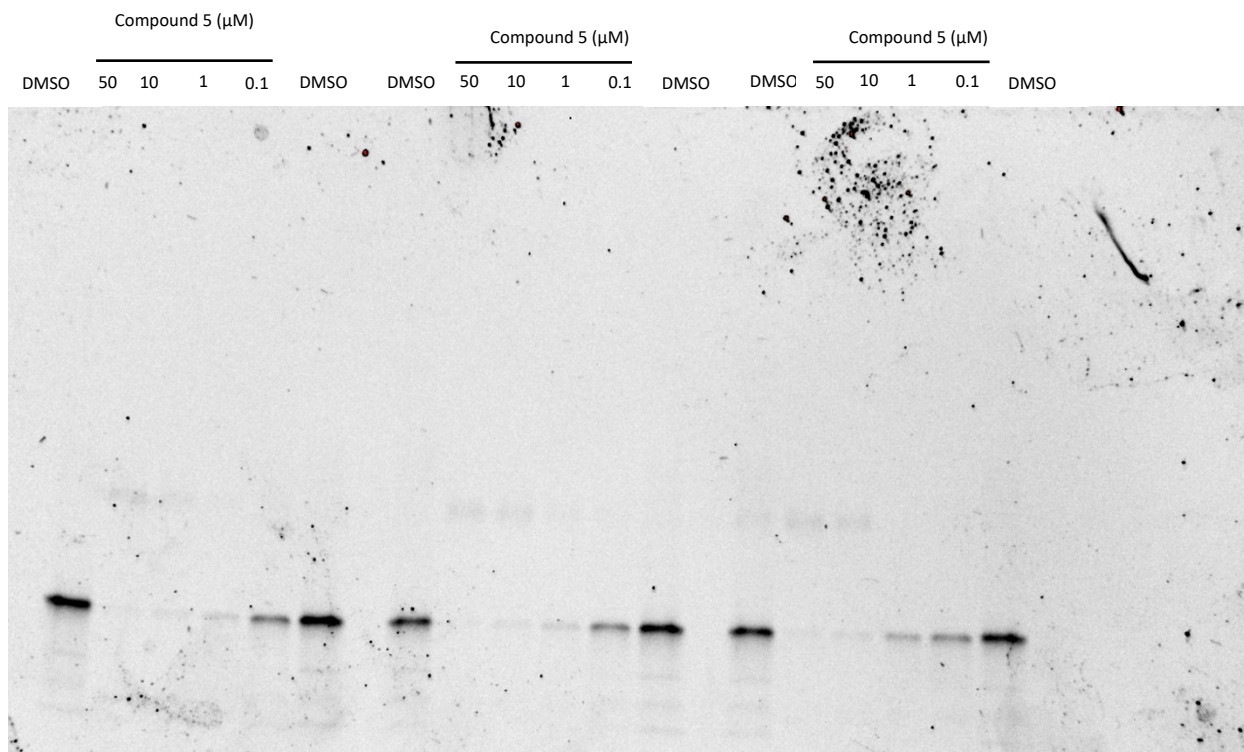

**Raw image of Fig 3.** Activity based protein profiling of compound 5. Cysteines in PLpro were chased with iodoacetamide-rhodamine in absence and presence of compound 5 (concentrations of 0.1, 1, 10 and 50 $\mu\text{M}$ ). The gel was imaged using rhodamine fluorescence.

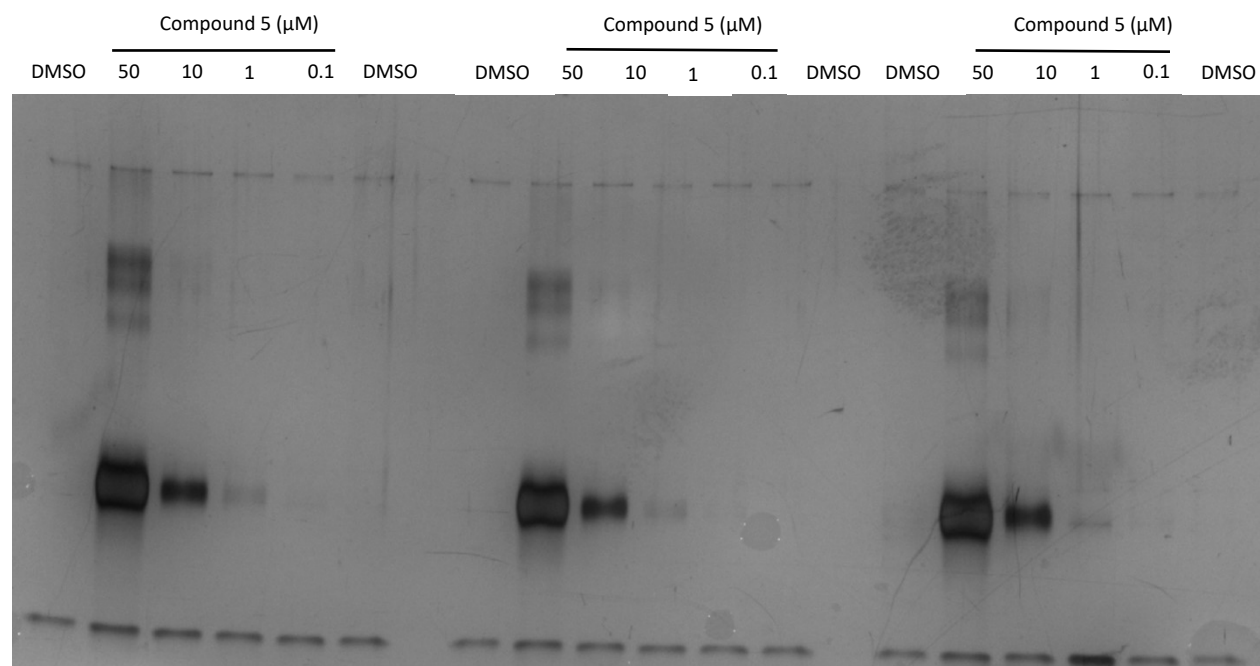

**Raw image of Fig 3.** Activity based protein profiling of compound 5. Cysteines in PLpro were chased with iodoacetamide-rhodamine in absence and presence of compound 5 (concentrations of 0.1, 1, 10 and 50 $\mu\text{M}$ ). The gel was stained with silver stain for control.

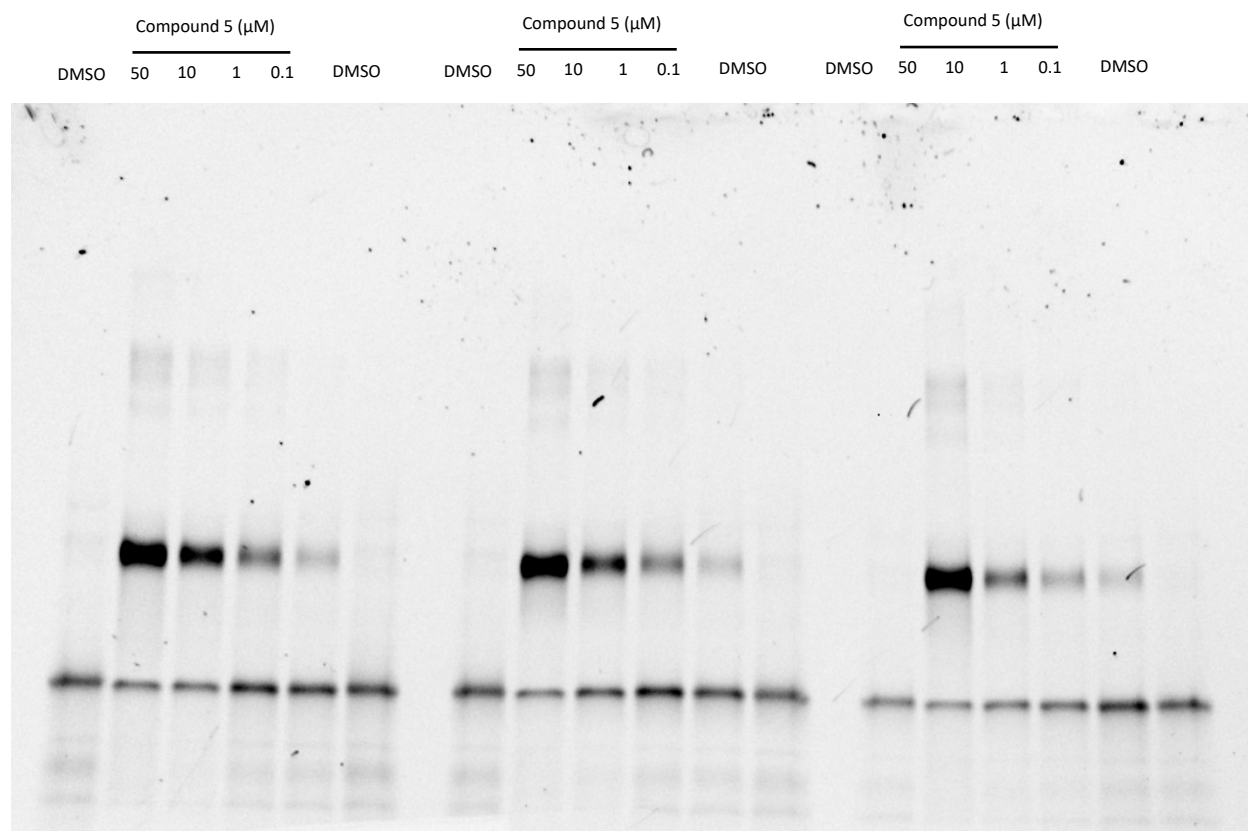

**Raw image.** Activity based protein profiling of compound 5. Lysines in PLpro were chased with NHS-rhodamine in absence and presence of compound 5 (concentrations of 0.1, 1, 10 and 50 $\mu\text{M}$ ). The gel was imaged using rhodamine fluorescence.

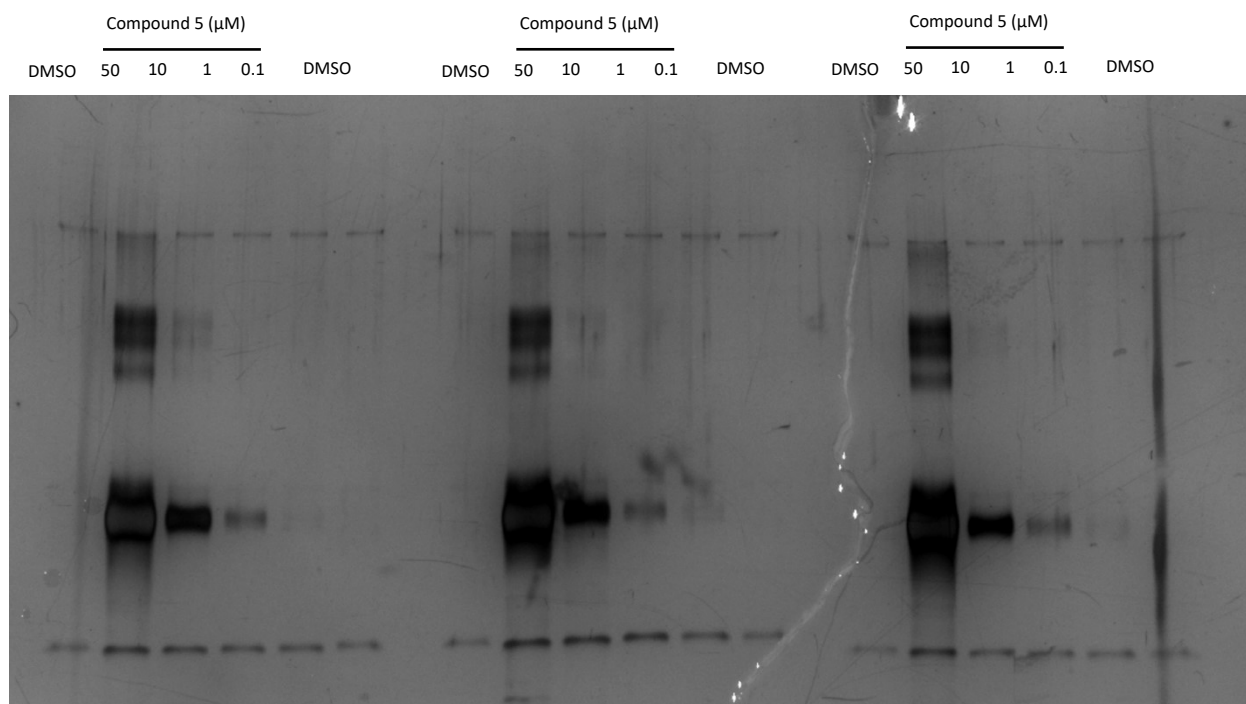

**Raw image.** Activity based protein profiling of compound 5. Lysines in PLpro were chased with NHS-rhodamine in absence and presence of compound 5 (concentrations of 0.1, 1, 10 and 50 $\mu\text{M}$ ). The gel was stained with silver stain for control.
